# Supplementary material
Source: publisher figshare collection journal article supplement (https://frontiersin.figshare.com/ndownloader/files/20033822)
Supplement: Supplementary file [file 20033822]

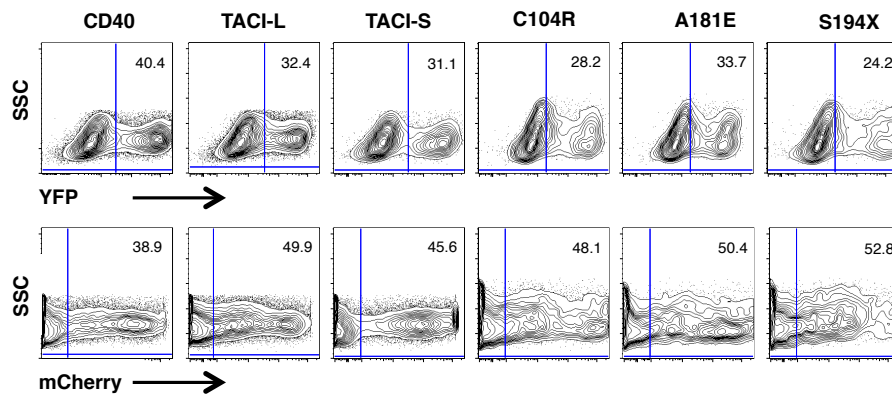

**Supplemental Figure S1. YFP and mCherry expression in double-transfected cells for FRET experiments.** Representative flow cytometry (LSRII) contour plots showing the expression of the reporter genes YFP and mCherry for Figure 1A and Figure 1B.
